# Supplementary material for: Nationwide Cross-sectional Survey of the Use of Explanatory Documents to Obtain Child Assent in Pediatric Practice in Japan
Source: Research Square preprint supplement (doi:10.21203/rs.3.rs-7821345/v1), 2025-10-30
Supplement: Supplementary file 1 [file 8f9ccb633b3077a61315accd.docx]

Questionnaire: Current Status of Informed Assent Documents in Pediatric Practice (English Translation)

Background:
Obtaining informed consent in clinical practice is well established. However, the current status of informed assent for pediatric patients remains unclear.
This questionnaire aims to examine how informed assent is implemented in clinical practice.

Informed assent: Providing children with explanations that are appropriate for their developmental level regarding forthcoming medical procedures and obtaining their agreement or acknowledgment.
(Target age: 7–14 years, according to the American Academy of Pediatrics guidelines)

1. About your institution

1. Number of beds

- Fewer than 500
- 500 or more

1. Is your institution a pediatric specialty hospital?

- Yes
- No

2. About the respondent’s occupation

- Physician
- Nurse
- Medical records administrator
- Other (please specify)

3. Informed consent (IC) documents at your institution

We ask about documents centrally managed in electronic medical record systems.
Does your institution have informed consent documents for the following procedures?

1. Contrast-enhanced CT

- Yes / No

1. Contrast-enhanced MRI

- Yes / No

1. Blood transfusion and plasma fraction products

- Yes / No

1. Hospitalization

- Yes / No

1. General anesthesia

- Yes / No

4. Informed assent (IA) documents at your institution

We ask about documents centrally managed in electronic medical record systems.
Does your institution have informed assent documents for the following procedures?

1. Contrast-enhanced CT

- Yes / No

1. Contrast-enhanced MRI

- Yes / No

1. Blood transfusion and plasma fraction products

- Yes / No

1. Hospitalization

- Yes / No

1. General anesthesia

- Yes / No

5. Other informed assent documents

Besides the above, does your institution prepare any other informed assent documents that are managed in electronic medical records?

- Yes / No

If yes, please specify the medical procedures:
(e.g., genetic testing, cancer chemotherapy, etc.)

6. Initiatives to respect the wishes of pediatric patients

Does your institution implement any measures to respect children’s wishes?
(e.g., using picture books to explain procedures before surgery as psychological preparation)

7. Pediatric patient rights

Has your institution established a statement or charter on “the rights of pediatric patients”?

- Yes / No

If yes, please indicate:

1. Timing of establishment: ______ (year/month)
2. Reason for establishment:

- For hospital accreditation or evaluation
- In response to requests from patients/families
- In reference to the “Children’s Charter in Healthcare” of the Japan Pediatric Society
- Determined necessary by the hospital
- Other: ___________

End of Questionnaire
Thank you very much for your cooperation.
